# Supplementary material for: Virtual Evolution of HVEM Segment for Checkpoint Inhibitor Discovery
Source: MDPI journal article supplement (doi:10.3390/ijms22126638), 2021-06-21
Supplement: s1 [file s1]

# Virtual evolution of HVEM segment for checkpoint inhibitor discovery

Mingjia Yu <sup>1,†</sup>, Huimin Zhao <sup>2,†</sup>, Yuhui Miao <sup>2</sup>, Shi-Zhong Luo <sup>2,\*</sup> and Song Xue <sup>2,\*</sup>

<sup>1</sup> Beijing Advanced Innovation Centre for Soft Matter Science and Engineering, Beijing University of Chemical Technology, Beijing 100029, China; 2019750009@mail.buct.edu.cn

<sup>2</sup> Beijing Key Laboratory of Bioprocess, College of Life Science and Technology, Beijing University of Chemical Technology, Beijing 100029, China; 18634404469@163.com (H.Z.); ukimiao@foxmail.com (Y.M.)

\* Correspondence: luosz@mail.buct.edu.cn (S.-Z.L.); xues@mail.buct.edu.cn (S.X.)

† Those two authors contributed equally to this article.

## Principles of single point saturation mutagenesis *in silico*

The simulations of single point saturation mutagenesis were performed with CHARMM Polar H force field in pH-dependent mode. The pH value, ionic strength, solvent dielectric constant and energy cutoff were set at 7.4, 0.1, 80 and 0.5, respectively. The advanced parameters set for the simulations including electrostatic, van der Waals and entropy were all kept by default. The description for Calculate Mutation Energy (Binding) protocol will be illustrated in details as follows.

The Calculate Mutation Energy (Binding) protocol evaluates the effect of mutations on the binding affinity of molecular partners in protein-protein and protein-ligand complexes. It performs combinatorial amino-acid scanning mutagenesis on a set of selected amino-acid residues by mutating them to one or more specified amino-acid types. All energy terms are calculated by CHARMM and the electrostatics energy is calculated using a Generalized Born implicit solvent model. The energy effect of each mutation on the binding affinity (mutation energy,  $\Delta\Delta G_{mut}$ ) is calculated as the difference between the binding free energy in the mutated structure and wild type protein:

$$\Delta\Delta G_{mut} = \Delta\Delta G_{bind}(mutant) - \Delta\Delta G_{bind}(wild\ type)$$

The binding free energy,  $\Delta\Delta G_{bind}$ , is defined as the difference between the free energy of the complex and unbound state:

$$\Delta\Delta G_{bind} = \Delta G_{cplx}(complex) - \Delta G_{unbnd}(unbound\ state)$$

The calculations were performed in pH-dependent mode by using a model with titratable acidic and basic residues. The calculations of non-polar contributions to the free energy of binding are combined with calculations of protein ionization of the wild type and mutated structures in both the bound and unbound states. The electrostatic energy terms are obtained by integration over the proton binding isotherms, derived from the fractional protonation of the sites of titration. This model also includes the effect of ionic strength,  $I$ , on the calculated free energy terms. The total energy is calculated as an empirical weighted sum of van der Waals ( $E_{vdW}$ ) interaction, electrostatic interactions ( $\Delta G_{elec}$ ), an entropy contribution ( $-TS_{sc}$ ) related to the changes in side-chain mobility, and a non-polar, surface dependent, contribution to solvation energy ( $\Delta G_{np}$ ).

$$\Delta G_{tot}(pH) = aE_{vdW} + \Delta G_{elec}(pH, I) - cTS_{sc} + \Delta G_{np}$$

In this mode, the temperature changes are not taken into account and the results

correspond to temperatures at or close to 20°C.

**Ref:**

Spassov VZ, Yan L. pH-selective mutagenesis of protein-protein interfaces: in silico design of therapeutic antibodies with prolonged half-life. *Proteins*. 2013 Apr;81(4):704-14. doi: 10.1002/prot.24230. Epub 2013 Jan 15. PMID: 23239118; PMCID: PMC3601434.

**ZDOCK method**

ZDOCK is a rigid-body docking program that requires minimal information about the binding site and is targeted at initial-stage unbound docking. The program uses individual protein structures determined by experimental or computational methods as inputs and predicts the structure of a number of protein complexes (i.e., the top 2000 complexes). ZDOCK uses a simple shape complementarity method called Pairwise Shape Complementarity (PSC). The PSC method is optionally augmented with desolvation (DE) and electrostatic (ELEC) energy terms to rank the docked poses. PSC is not based explicitly on protein surface curvature or surface area, but rather rewards all close atomic contacts between the protein receptor and the protein ligand within a specific cutoff distance. PSC has been shown to yield better results than the common grid-based shape complementarity (GSC) method. It rewards contiguous surface patches at the binding site and implicitly accounts for the curvature of the binding surface.

**Ref:**

Chen R, Weng Z. A novel shape complementarity scoring function for protein-protein docking. *Proteins*. 2003 May 15;51(3):397-408. doi: 10.1002/prot.10334. PMID: 12696051.

Chen R, Li L, Weng Z. ZDOCK: an initial-stage protein-docking algorithm. *Proteins*. 2003 Jul 1;52(1):80-7. doi: 10.1002/prot.10389. PMID: 12784371.

Yes, the details of the docking calculation are given in the supplementary material, which include all the scores of top ranked protein poses.

**Figure S1.** SPR results of the mutated and native peptides with BTLA.

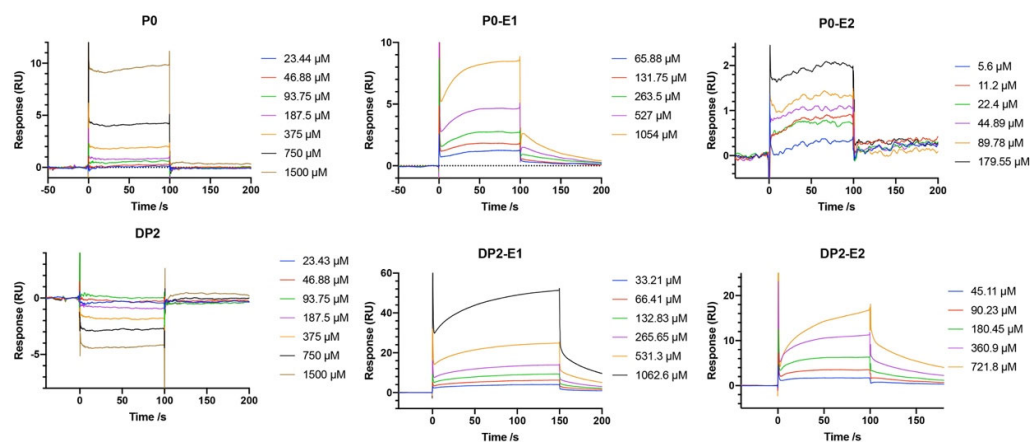

**Figure S2.** ZDOCK scores of top ranked protein poses and the chosen one.

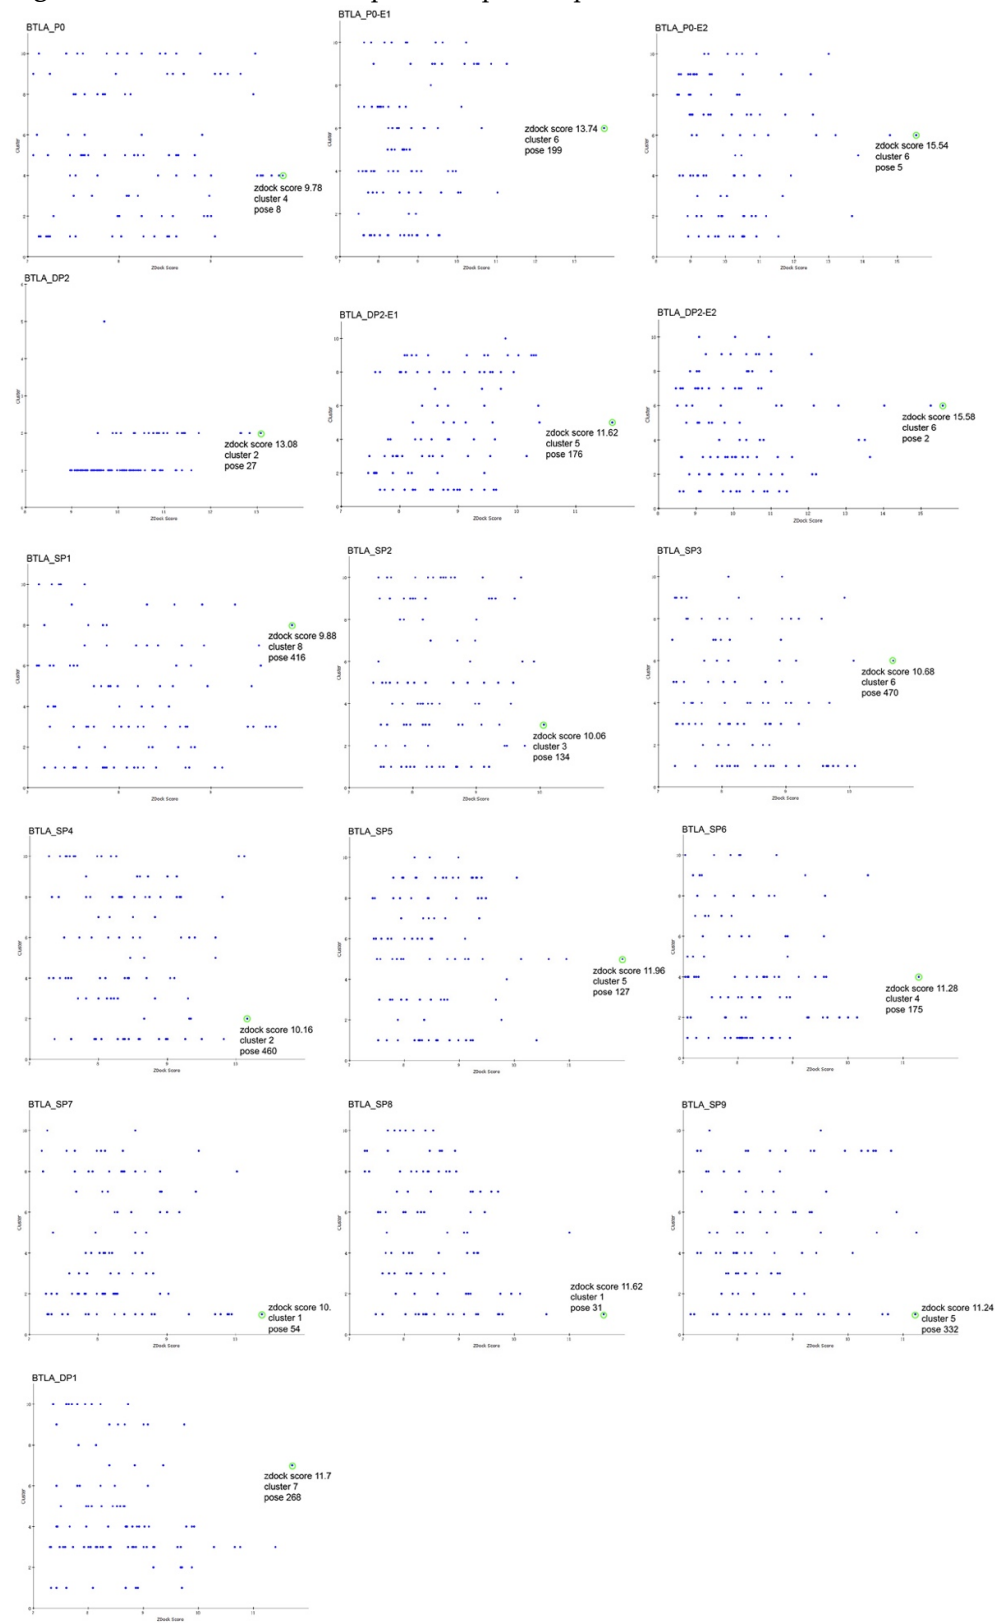

**Figure S3.** Superposition of two complexes including the last structure of BTLA+P0/BTLA+DP2/BTLA+P0-E2/BTLA+DP2-E2 obtained from the MD (colored in yellow) and the complex of BTLA+P0/BTLA+DP2/BTLA+P0-E2/BTLA+DP2-E2 obtained from zdock complex (colored ice blue). The RMSD values of the structures aligned by PyMOL including the last structure of BTLA+P0/BTLA+DP2/BTLA+P0-E2/BTLA+DP2-E2 obtained from the MD (colored in yellow) and the complex of **(A)** BTLA+P0/**(B)** BTLA+DP2/**(C)** BTLA+P0-E2/**(D)** BTLA+DP2-E2 obtained from zdock complex (colored ice blue) are 0.937, 0.902, 0.824 and 0.639 respectively.

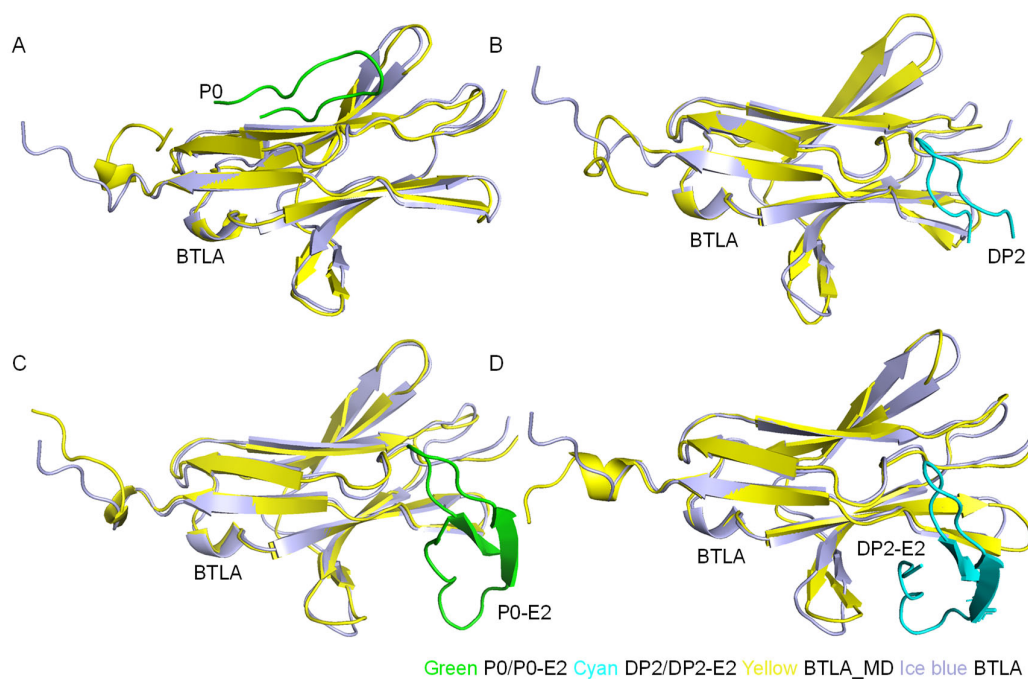

**Figure S4.** The RMSD profiles of 100 ns MD simulations of BTLA with P0/DP2/P0-E2/DP2-E2. The RMSD values of complexes between (A) BTLA and P0, (B) BTLA and DP2, (C) BTLA and P0-E2, (D) BTLA and DP2-E2. The RMSD values of Calpha [RMSDCa], backbone [RMSDBb] and all-heavy atom [RMSDAI] are shown in red, blue and green, respectively.

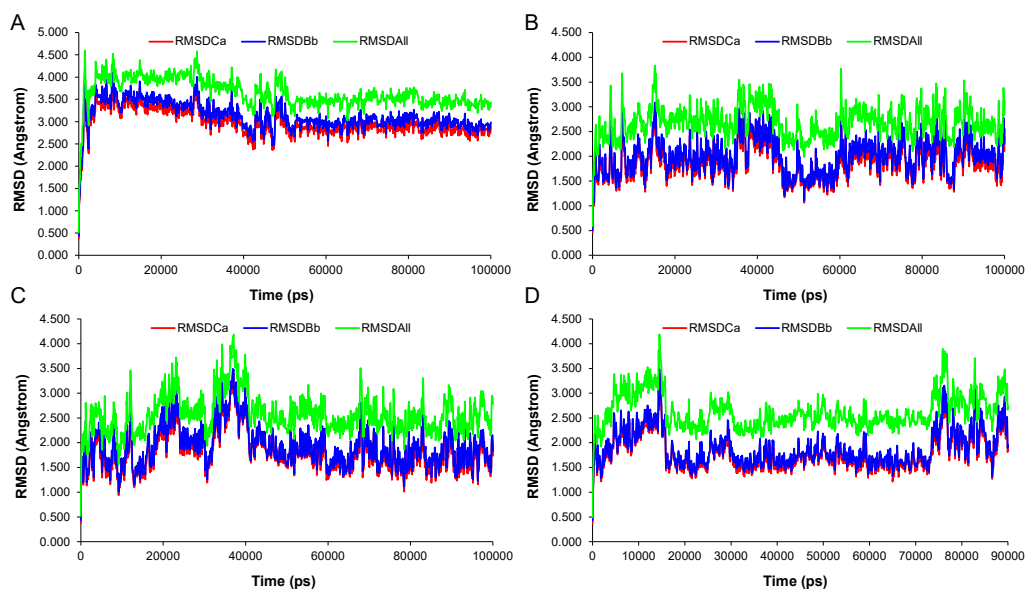

**Table S1.** The interaction of hydrogen bonds between BTLA and DP2.

| Atoms in the Residues<br>of BTLA | Atoms in the Residues<br>of DP2 | Hydrogen<br>bond (Å) | Hydrogen<br>bond angle (°) |
|----------------------------------|---------------------------------|----------------------|----------------------------|
| GLN37/HE21                       | GLY34/O                         | 2.2101               | 160.549                    |
| ARG42/HN                         | GLU31/O                         | 1.8424               | 141.57                     |
| ARG42/HN                         | GLU31/OE2                       | 2.464                | 92.077                     |
| ARG42/HE                         | GLU31/OE1                       | 2.4198               | 132.089                    |
| LEU123/HN                        | CYS37/O                         | 2.0297               | 93.175                     |
| GLU125/HN                        | THR35/O                         | 2.3129               | 121.307                    |
| LEU38/O                          | GLY34/HN                        | 2.1359               | 161.433                    |
| GLU125 /O                        | THR35/HN                        | 2.1144               | 110.694                    |
| LEU123 /O                        | CYS37/HN                        | 2.0735               | 119.407                    |
| LYS41/HA                         | GLU31/O                         | 2.0351               | 117.897                    |
| LYS41/HE1                        | GLU31/OE2                       | 2.5038               | 122.423                    |
| ILE124/HA                        | THR35/O                         | 1.4613               | 155.202                    |
| ILE40/O                          | LEU32/HA                        | 2.0928               | 106.02                     |
| GLU125/O                         | GLY34/HA1                       | 2.7331               | 129.114                    |
| GLU125/O                         | GLY34/HA2                       | 2.7516               | 95.408                     |

**Table S2.** The interaction of hydrogen bonds between BTLA and DP2-E1.

| Atoms in the Residues of<br>BTLA | Atoms in the<br>Residues of DP2-E1 | Hydrogen<br>bond (Å) | Hydrogen bond<br>angle (°) |
|----------------------------------|------------------------------------|----------------------|----------------------------|
| ARG42/HH12                       | CYS29/O                            | 3.0172               | 90.32                      |
| GLY76/HN                         | CYS37/O                            | 2.2678               | 135.086                    |
| GLU125/O                         | GLY34/HN                           | 2.3041               | 95.5                       |
| GLY76/HA1                        | CYS37/O                            | 2.5818               | 97.088                     |
| SER128/HB2                       | THR35/O                            | 2.2794               | 132.316                    |
| GLN37/OE1                        | LEU32/HA                           | 2.8345               | 112.242                    |
| GLU125/O                         | THR33/HA                           | 1.7056               | 143.779                    |

Note: The highlighted indicate unique amino acids contributing to the interactions between BTLA and each peptide.

**Table S3.** The interaction of hydrogen bonds between BTLA and P0-E2.

| Atoms in the Residues of<br>BTLA | Atoms in the<br>Residues of P0-E2 | Hydrogen<br>bond (Å) | Hydrogen bond<br>angle (°) |
|----------------------------------|-----------------------------------|----------------------|----------------------------|
| GLN37/HE21                       | GLU27/OE2                         | 2.8517               | 150.665                    |
| GLN37/HE22                       | GLY34/O                           | 2.6915               | 95.625                     |
| ARG42/HN                         | GLU31/O                           | 1.7763               | 136.46                     |
| ARG42/HH22                       | SER15/O                           | 3.0938               | 141.158                    |
| LEU123/HN                        | CYS37/O                           | 1.7549               | 123.326                    |
| GLU125/HN                        | THR35/O                           | 1.9064               | 144.883                    |
| GLU125/OE2                       | SER20/HG                          | 3.0083               | 151.178                    |
| GLU125/O                         | THR35/HN                          | 1.8262               | 143.176                    |
| LEU123/O                         | CYS37/HN                          | 1.7289               | 126.044                    |
| ASN122/HA                        | CYS37/O                           | 2.7438               | 128.288                    |
| ILE124/HA                        | THR35/O                           | 1.9477               | 141.004                    |
| HIS127/HD2                       | THR33/O                           | 2.7022               | 108.008                    |
| GLU125/O                         | GLY34/HA2                         | 2.7293               | 97.188                     |
| SER121/O                         | PRO39/HD2                         | 2.8154               | 97.201                     |

Note: The highlighted indicate unique amino acids contributing to the interactions between BTLA and each peptide.

**Table S4.** The interaction of hydrogen bonds between BTLA and DP2-E2.

| Atoms in the Residues of<br>BTLA | Atoms in the<br>Residues of DP2-E2 | Hydrogen<br>bond (Å) | Hydrogen bond<br>angle (°) |
|----------------------------------|------------------------------------|----------------------|----------------------------|
| ARG42/H                          | GLU31/O                            | 1.6701               | 173.131                    |
| ARG42/HE                         | GLU31/OE1                          | 1.7993               | 131.64                     |
| ARG42/HH21                       | SER15/O                            | 2.5585               | 158.873                    |
| ARG114/HH12                      | LYS18/O                            | 1.8617               | 129.131                    |
| LEU123/HN                        | CYS37/O                            | 1.8176               | 148.977                    |
| GLU125/OE2                       | SER20/HN                           | 2.5879               | 153.177                    |
| GLN37/OE1                        | GLY34/HN                           | 2.4337               | 143.067                    |
| LEU38/O                          | GLY34/HN                           | 2.5105               | 136.492                    |
| TYR39/HA                         | LEU32/O                            | 2.1072               | 146.878                    |
| LYS41/HA                         | GLU31/O                            | 2.6557               | 125.724                    |
| LYS41/HE1                        | GLU31/OE2                          | 2.6222               | 137.676                    |
| ILE124/HA                        | THR35/O                            | 2.366                | 102.526                    |
| GLU125/OE2                       | CYS19/HA                           | 2.658                | 116.452                    |
| ILE40/O                          | LEU32/HA                           | 2.8481               | 104.713                    |
| LEU38/O                          | THR33/HA                           | 2.0442               | 162.812                    |
| GLU125/O                         | GLY34/HA2                          | 2.0472               | 99.317                     |
| GLU125/O                         | THR35/HB                           | 3.074                | 105.808                    |
| LEU123/O                         | VAL36/HA                           | 1.844                | 120.687                    |
| SER121/O                         | PRO39/HD2                          | 2.5245               | 165.199                    |

Note: The highlighted indicate unique amino acids contributing to the interactions between BTLA and each peptide.
